# Supplementary material for: Spatial Ecology of the Human Tongue Dorsum Microbiome
Source: PubMed Central journal article supplement — Cell Rep. Author manuscript; Available in PMC 2020 Apr 23. (PMC7179516; doi:10.1016/j.celrep.2020.02.097), 2020-03-24
Supplement: NIHMS1579454-supplement-1.pdf [file NIHMS1579454-supplement-1.pdf]

**Cell Reports, Volume 30**

**Supplemental Information**

**Spatial Ecology of the Human Tongue**

**Dorsum Microbiome**

**Steven A. Wilbert, Jessica L. Mark Welch, and Gary G. Borisy**







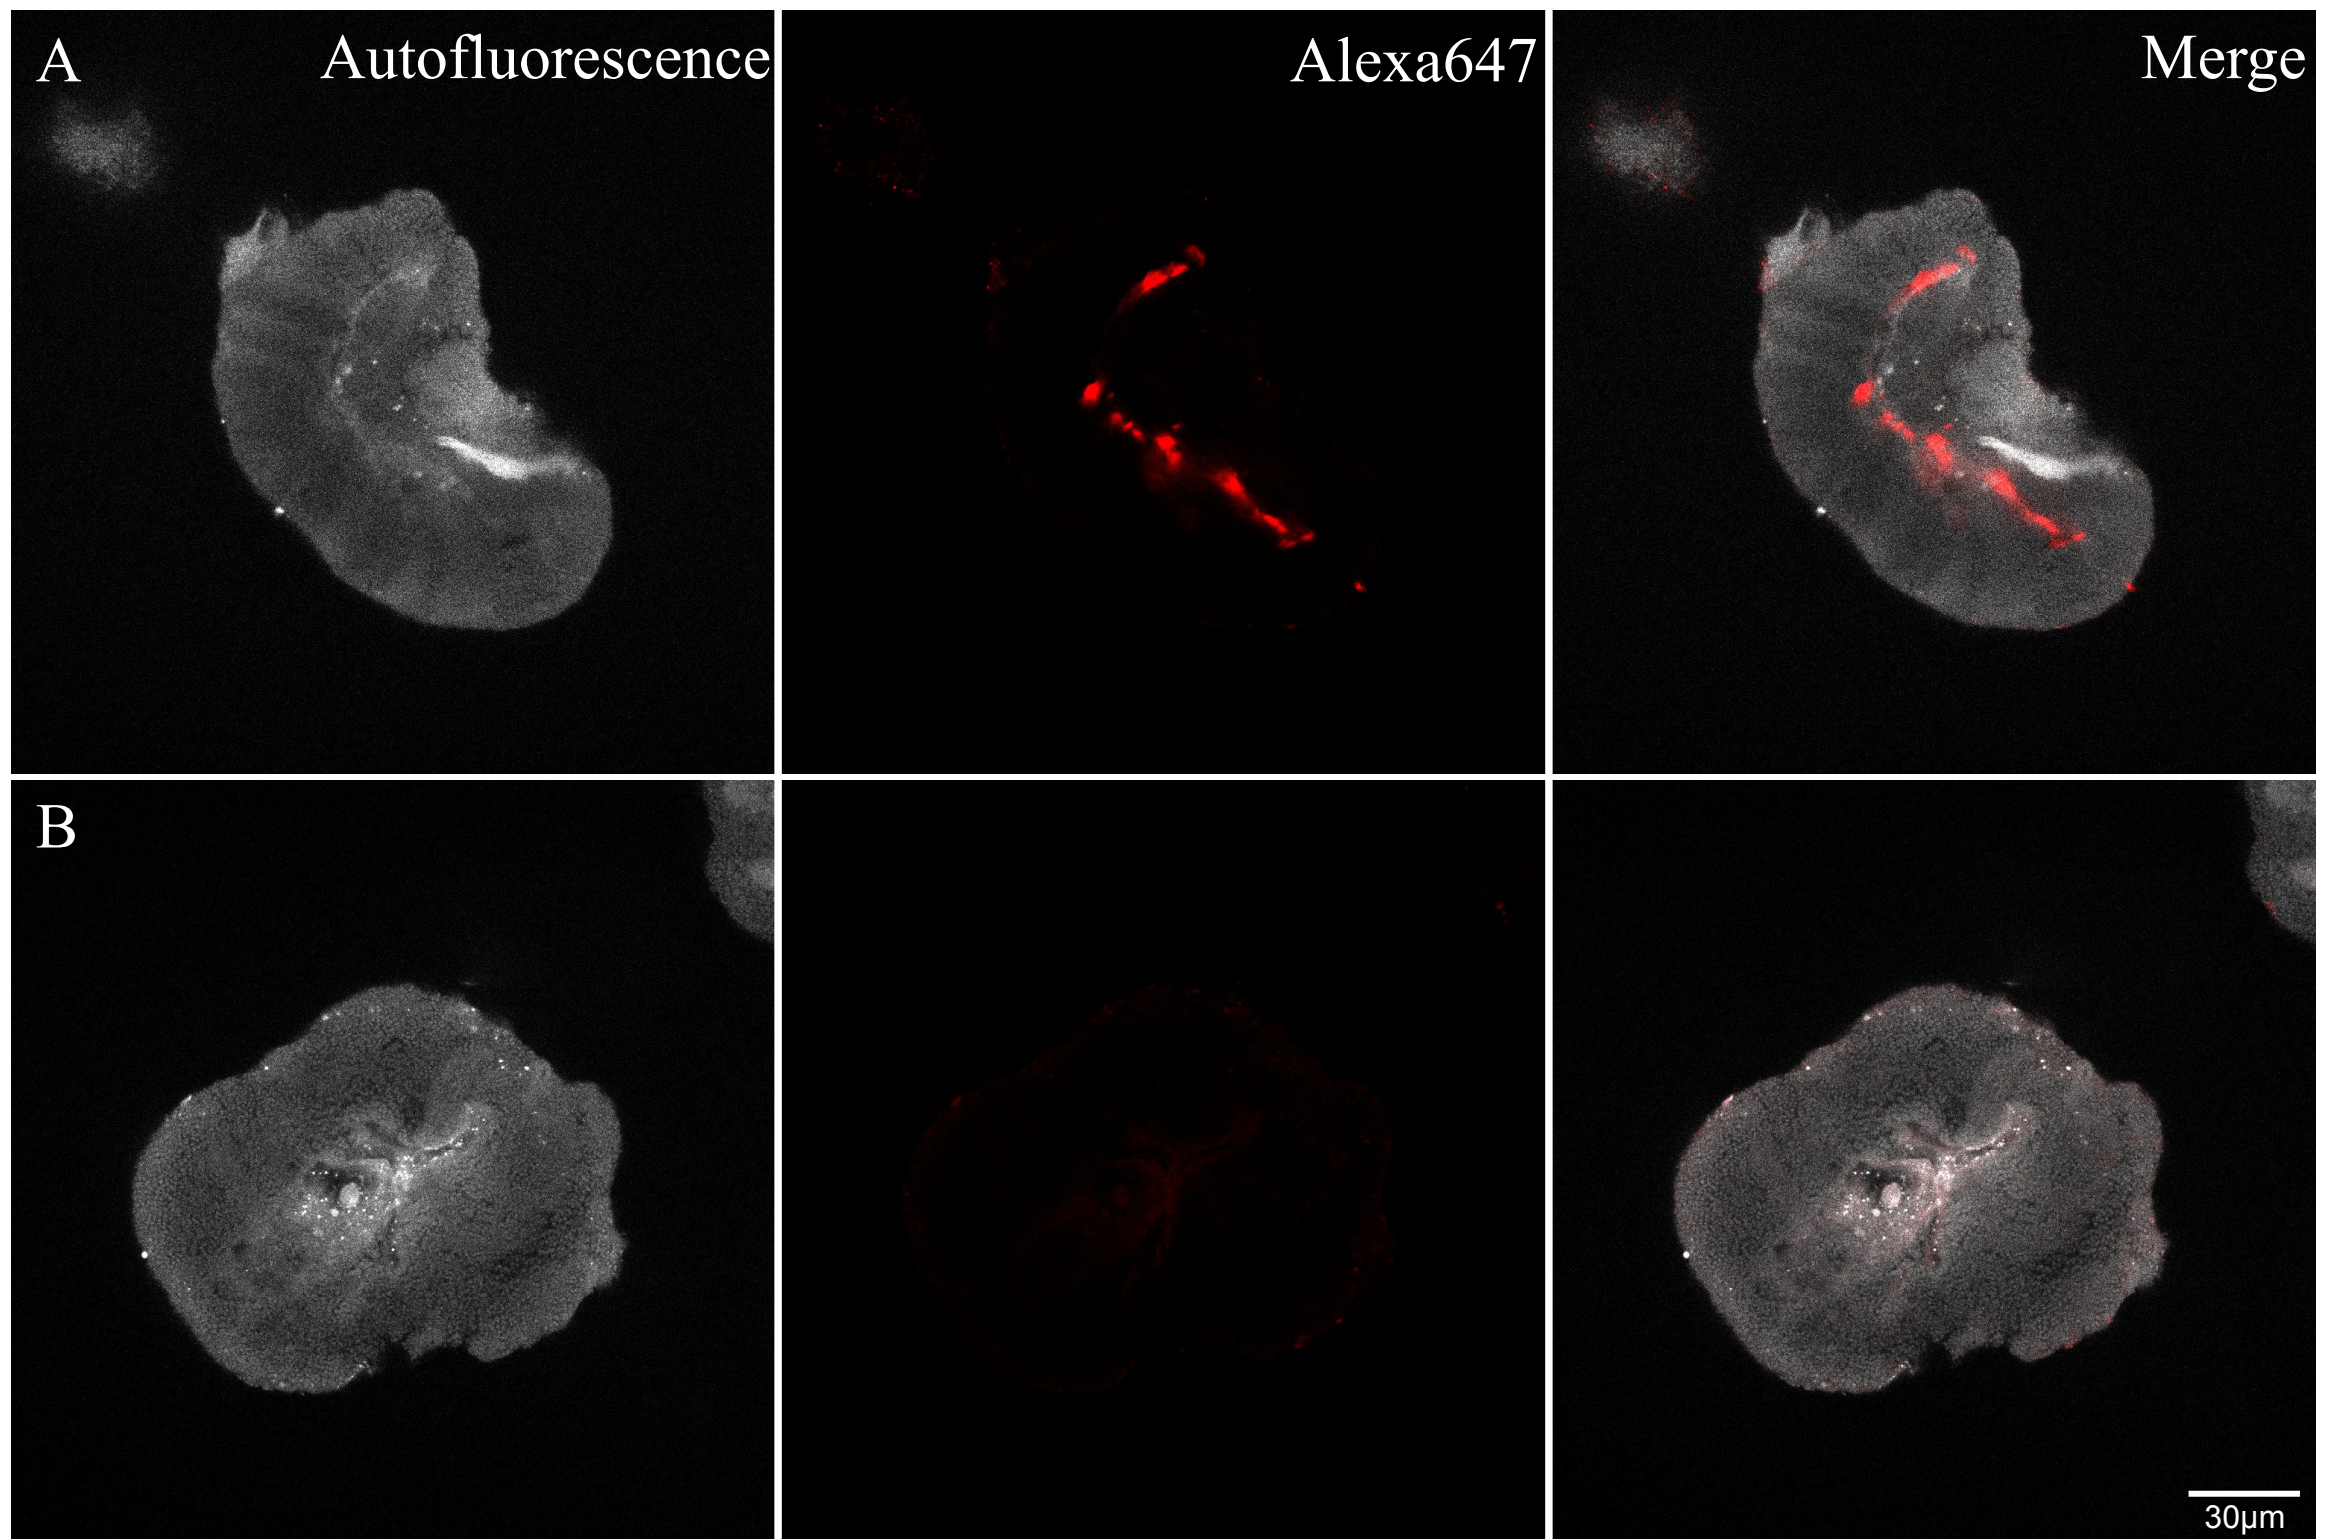

Supplemental Figure 2. **Pan-cytokeratin staining indicates that a consortium is structured around a core of keratinized epithelial cells. Related to Figure 5, Figure 6.** (A) A consortium viewed with autofluorescence (left, white) and with a pan-cytokeratin primary antibody visualized using a secondary antibody conjugated to Alexa 647 (center, red). An overlay of the two images (right) shows that the core contains cytokeratin, indicating keratinized eukaryotic epithelium. (B) Corresponding images of another consortium incubated with the secondary antibody but not the pan-cytokeratin primary antibody as a control for secondary antibody specificity.

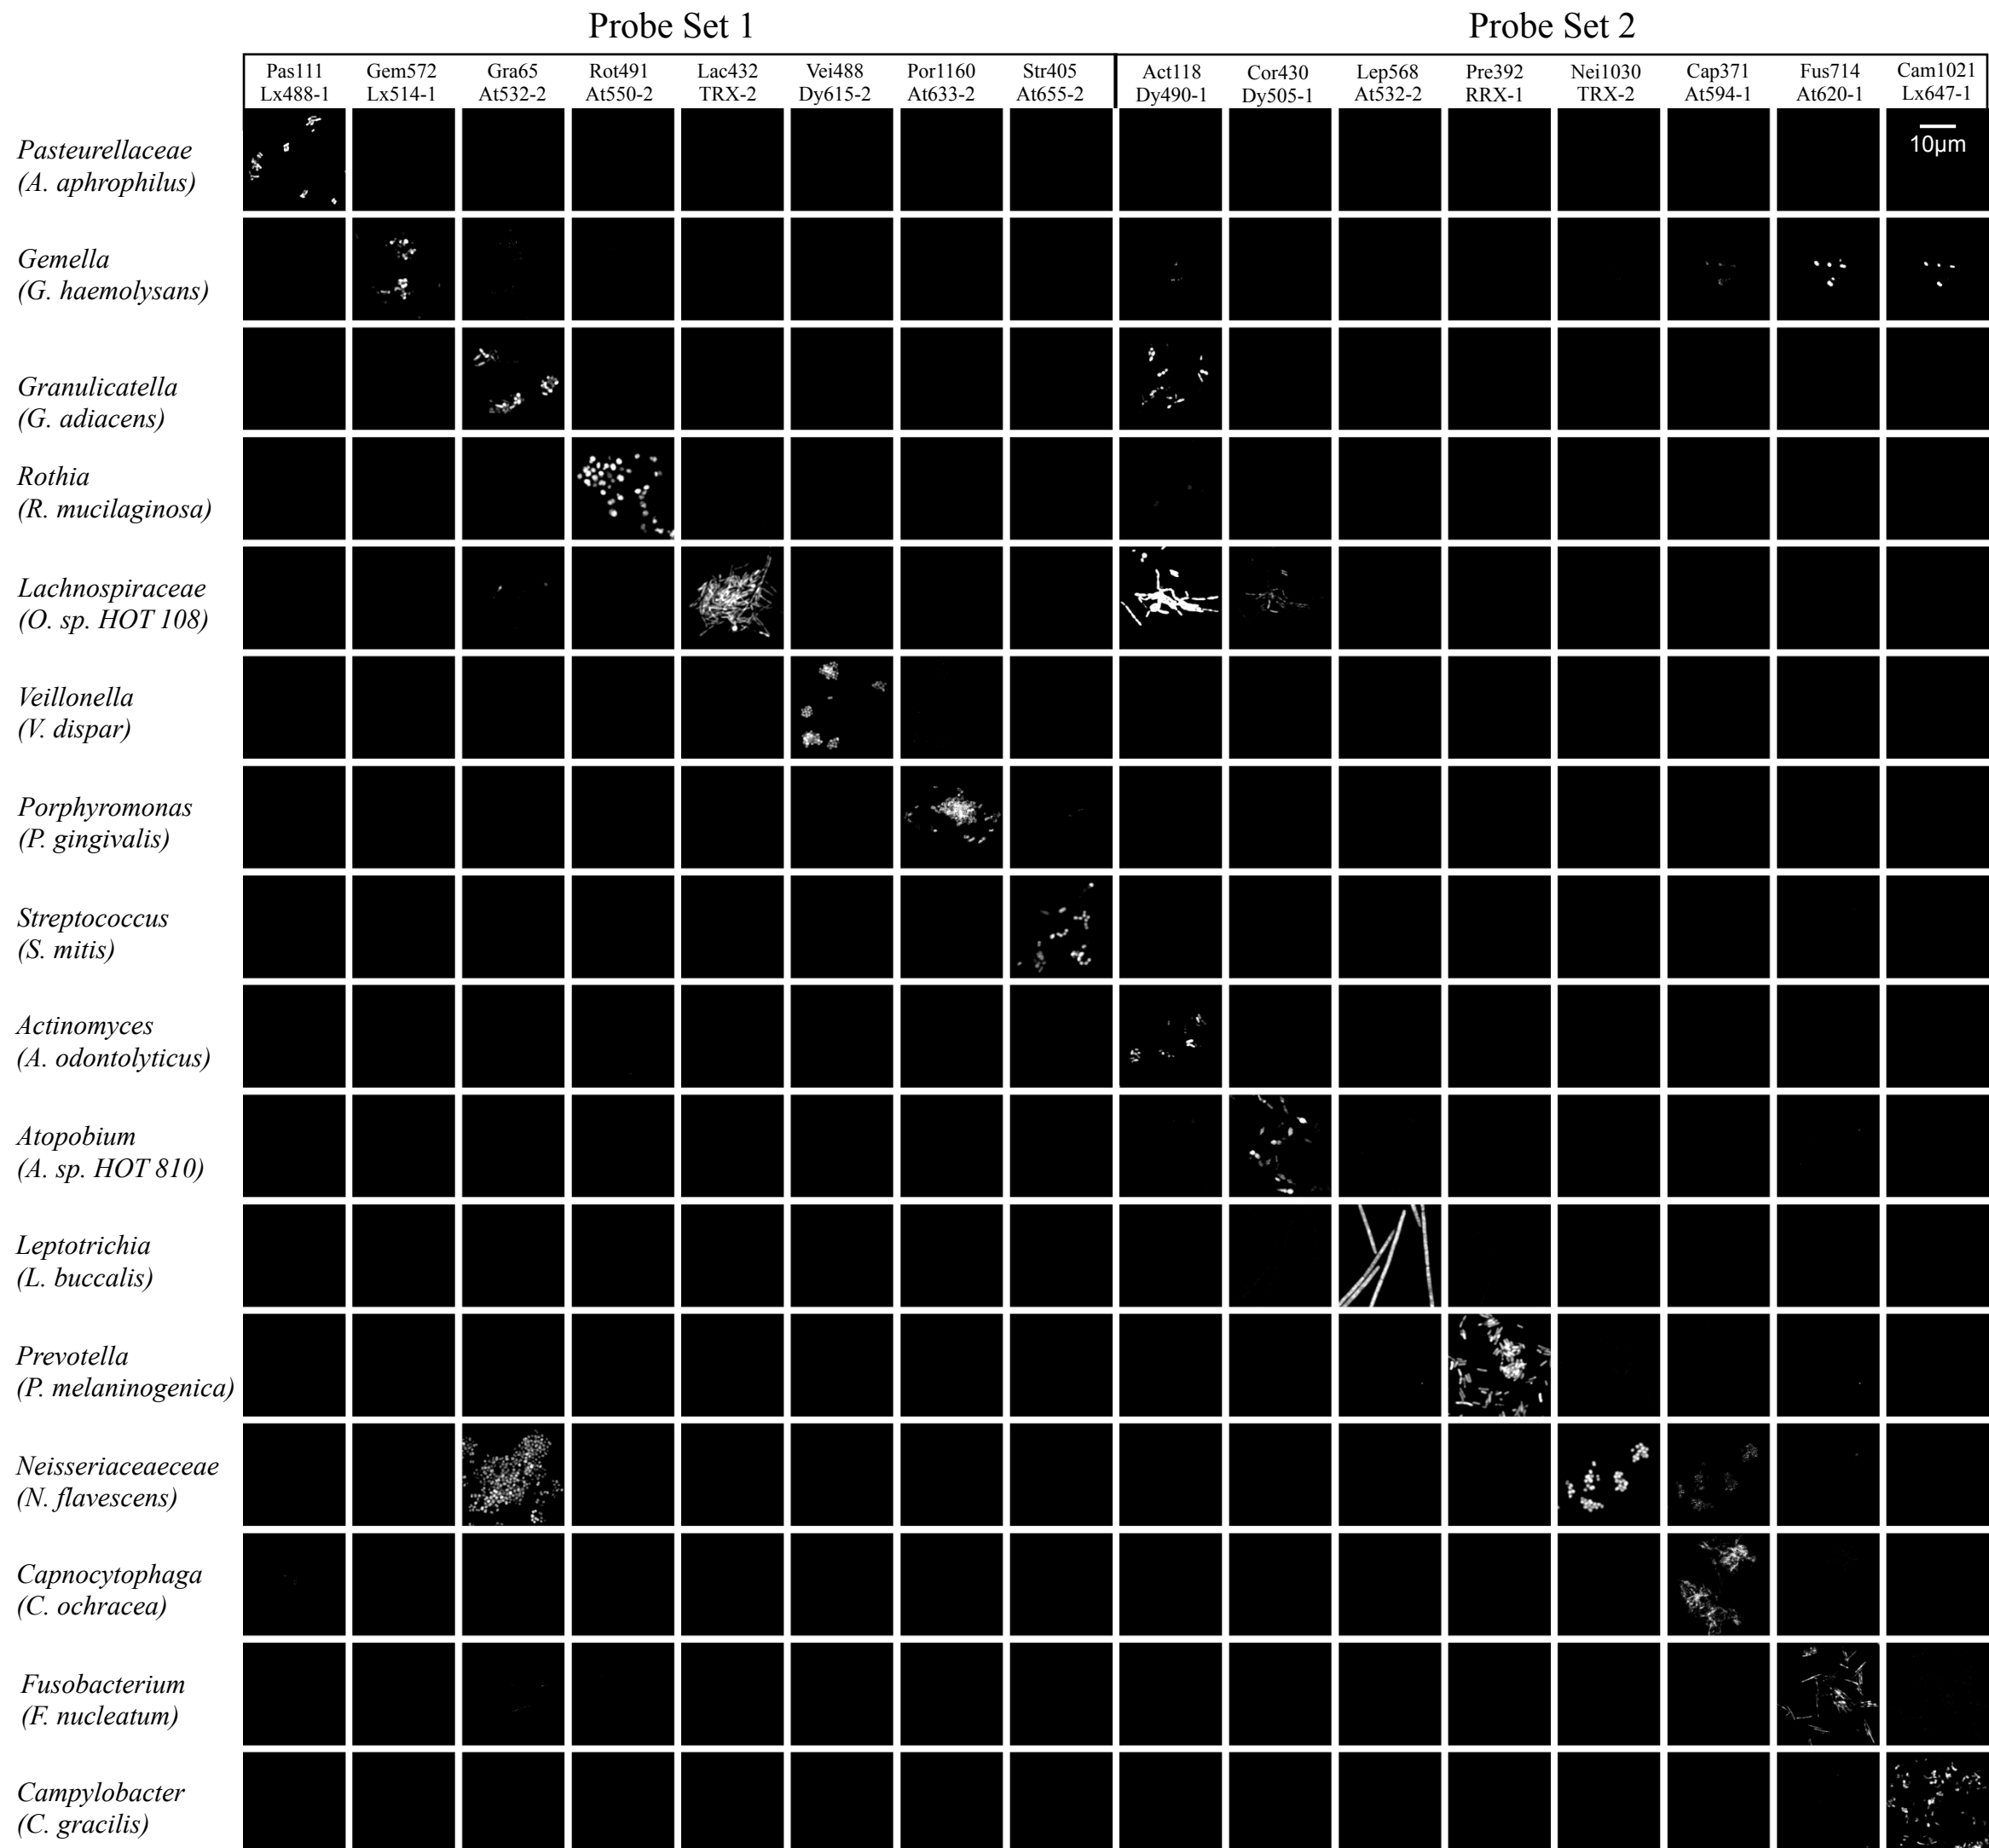

Supplemental Figure 3. **Validation matrix demonstrating efficacy and specificity of genus and family-level probes. Related to Figure 2, Figure 3, Figure 5.** Sixteen fluorophore-labeled oligonucleotide probes were mixed in sets of 8 and applied in fluorescence *in situ* hybridization to 16 pure cultures of bacterial cells. Cultures were imaged under identical conditions and the images were subjected to linear unmixing. Each row shows a different bacterial culture and each column shows the unmixed image corresponding to a different probe. Display intensity in each column is normalized to the brightest intensity in that column. Strong signals along the diagonal of the matrix indicate hybridization of each probe to its intended target cells. Most probes show negligible hybridization to non-target cells. Exceptions, e.g. *Oribacterium* cells reacting with the *Actinomyces* genus probe Act118, create ambiguity in taxon identification that can be mitigated by the use of nested probes with overlapping specificity (Fig. S2). For example, the *Actinomyces* cells in Fig. 4 B,C are unambiguously identified by the combination of a genus and species level probe.



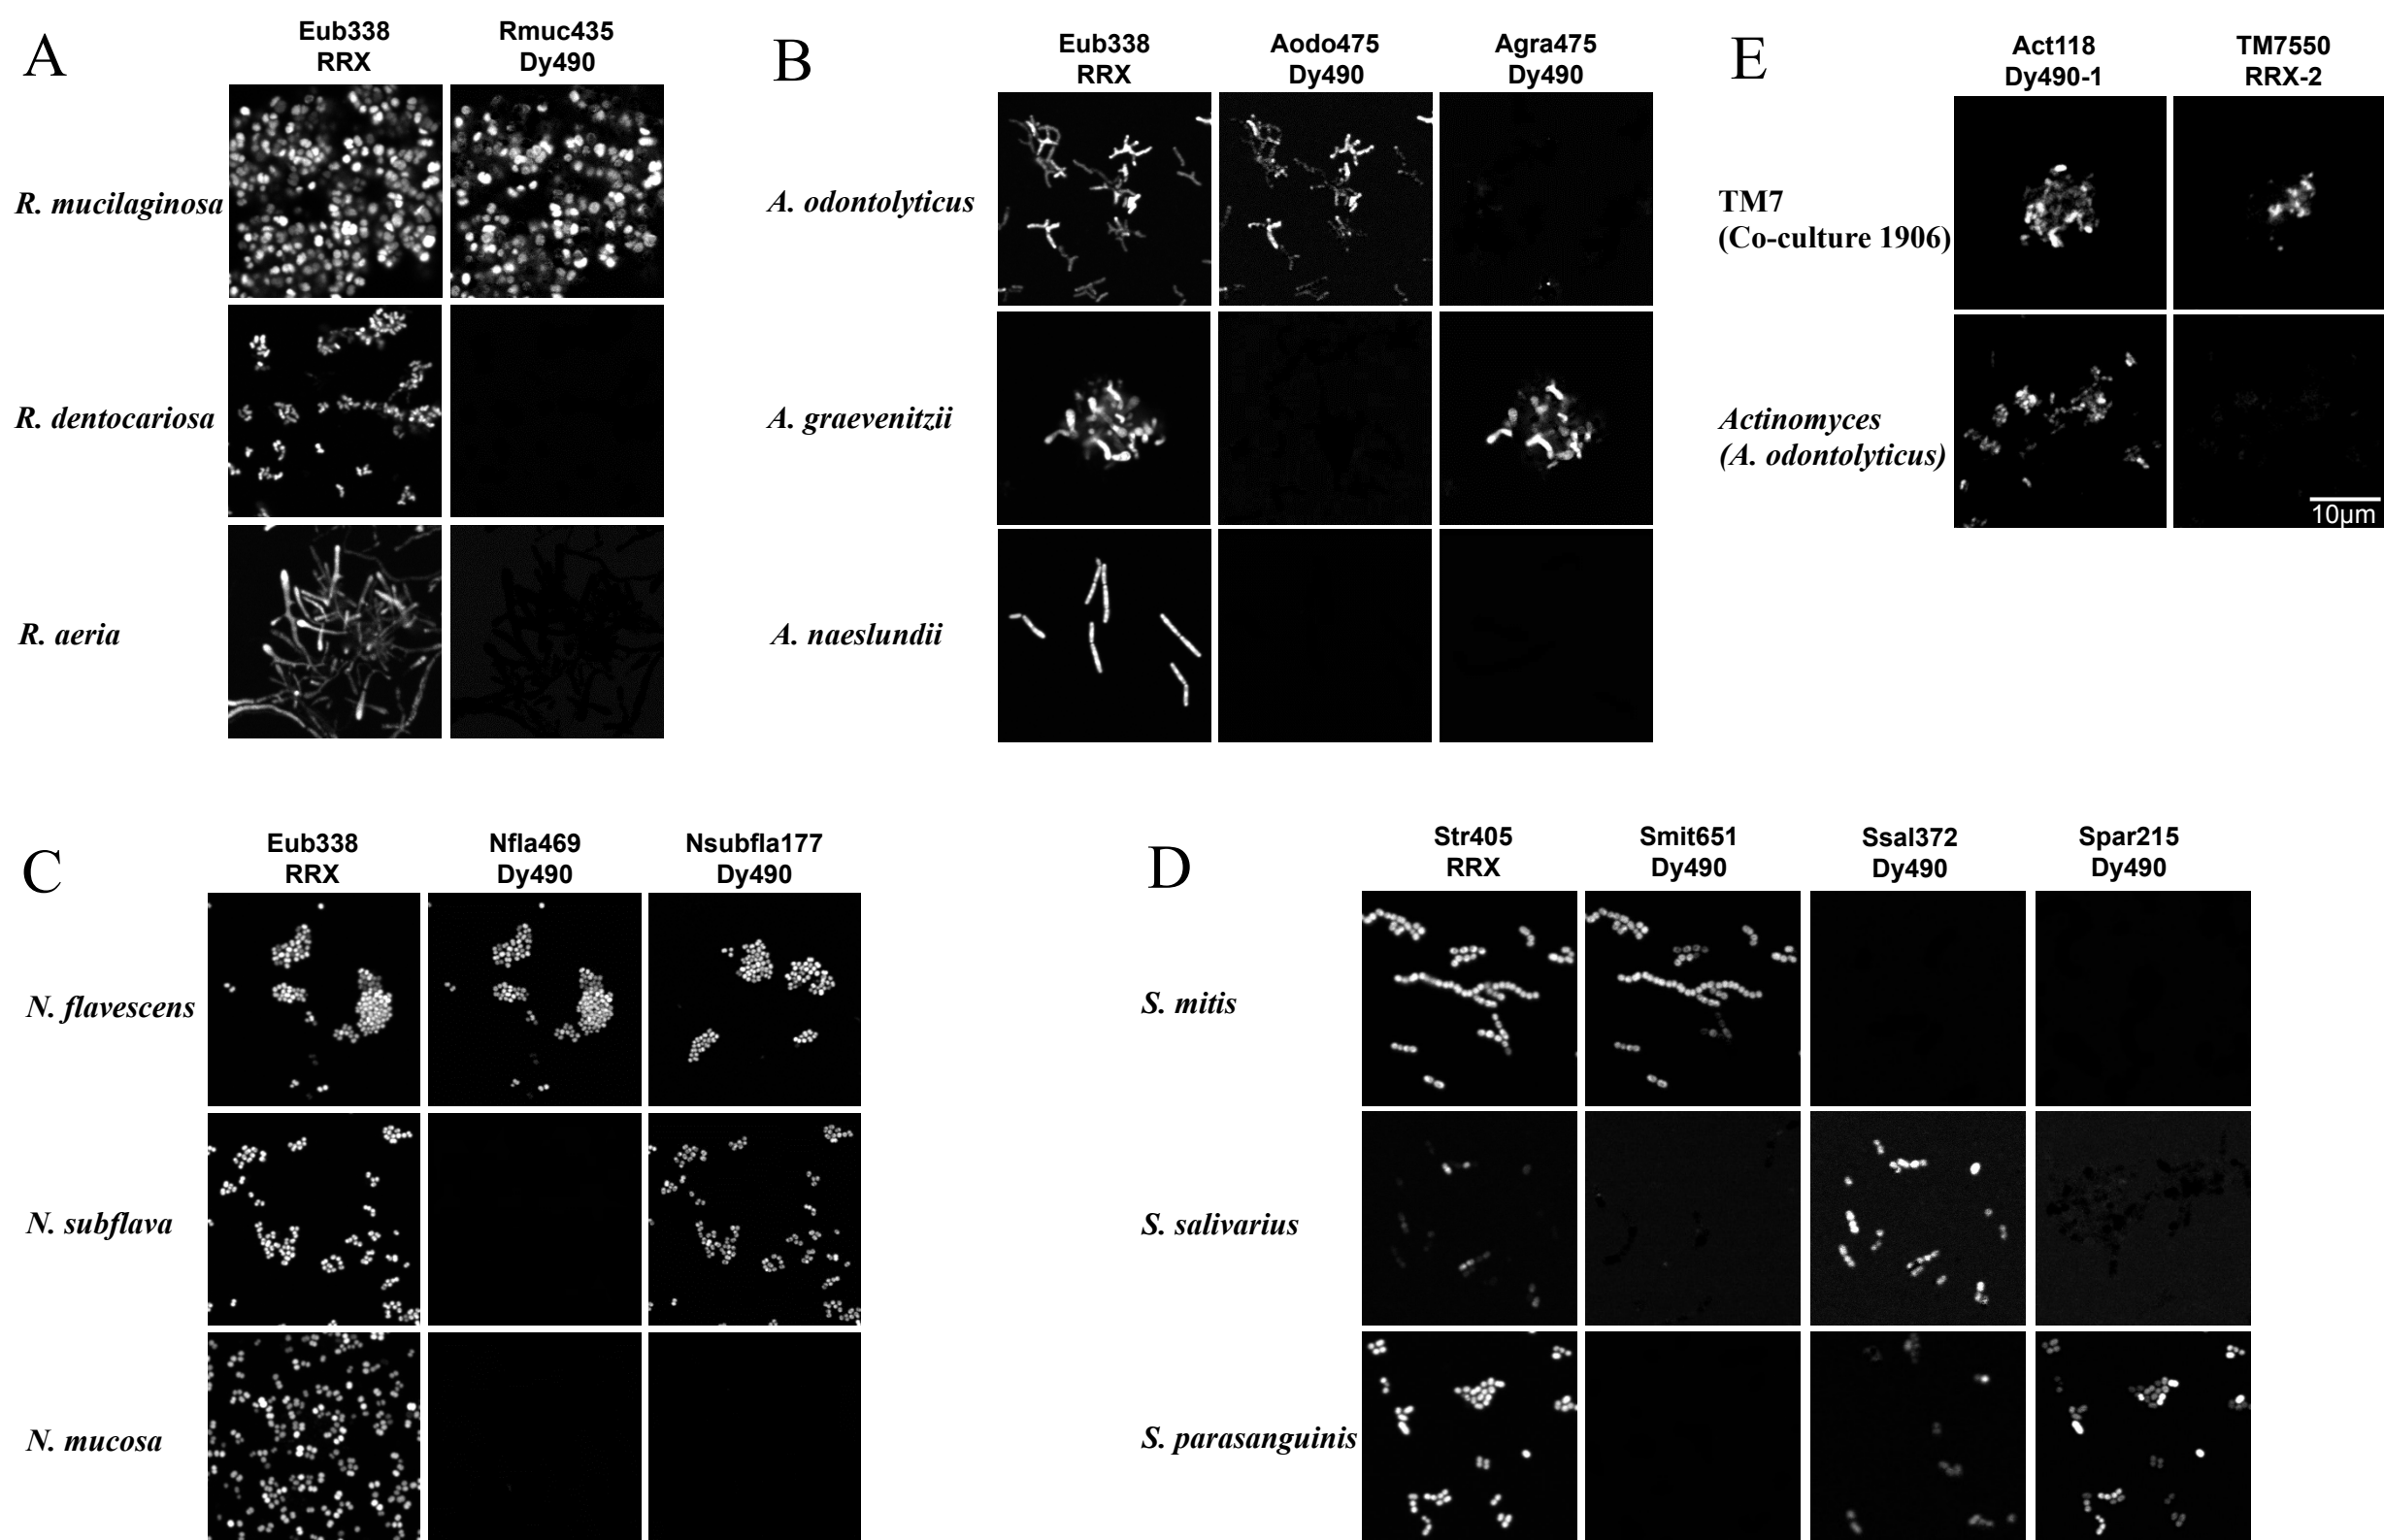

Supplemental Figure 4. **Validation matrices demonstrating efficacy and specificity of species-level probes. Related to Figure 4.**

Probes targeting abundant tongue-specialist species from the genera *Rothia*, *Actinomyces*, *Neisseria*, and *Streptococcus*, as well as phylum Saccharibacteria (TM7), were tested on cultivated representatives of both target and non-target (dental plaque-abundant) species in these genera. (A-C) The universal probe Eub338 was mixed with a species-specific probe, as shown, and applied to pure cultures of on- and off-target species, hybridized under identical conditions and imaged and displayed with identical settings. (B) and (C) each show two separate hybridizations; the Dy490 (species probe) channel is shown for each and the RRX (Eub338) panel for the target taxon is shown. (D) The Str405 genus probe was mixed with a *Streptococcus* species group probe and applied to both on- and off-target *Streptococcus* species. The Dy490 (species probe) channel is shown along with the RRX (genus probe) panel for the on-target reaction. (E) The Act118 (*Actinomyces* genus) probe was mixed with the TM7550 (TM7) probe and applied to a co-culture of *Actinomyces* with Saccharibacteria (TM7) and to a pure culture of *Actinomyces*.

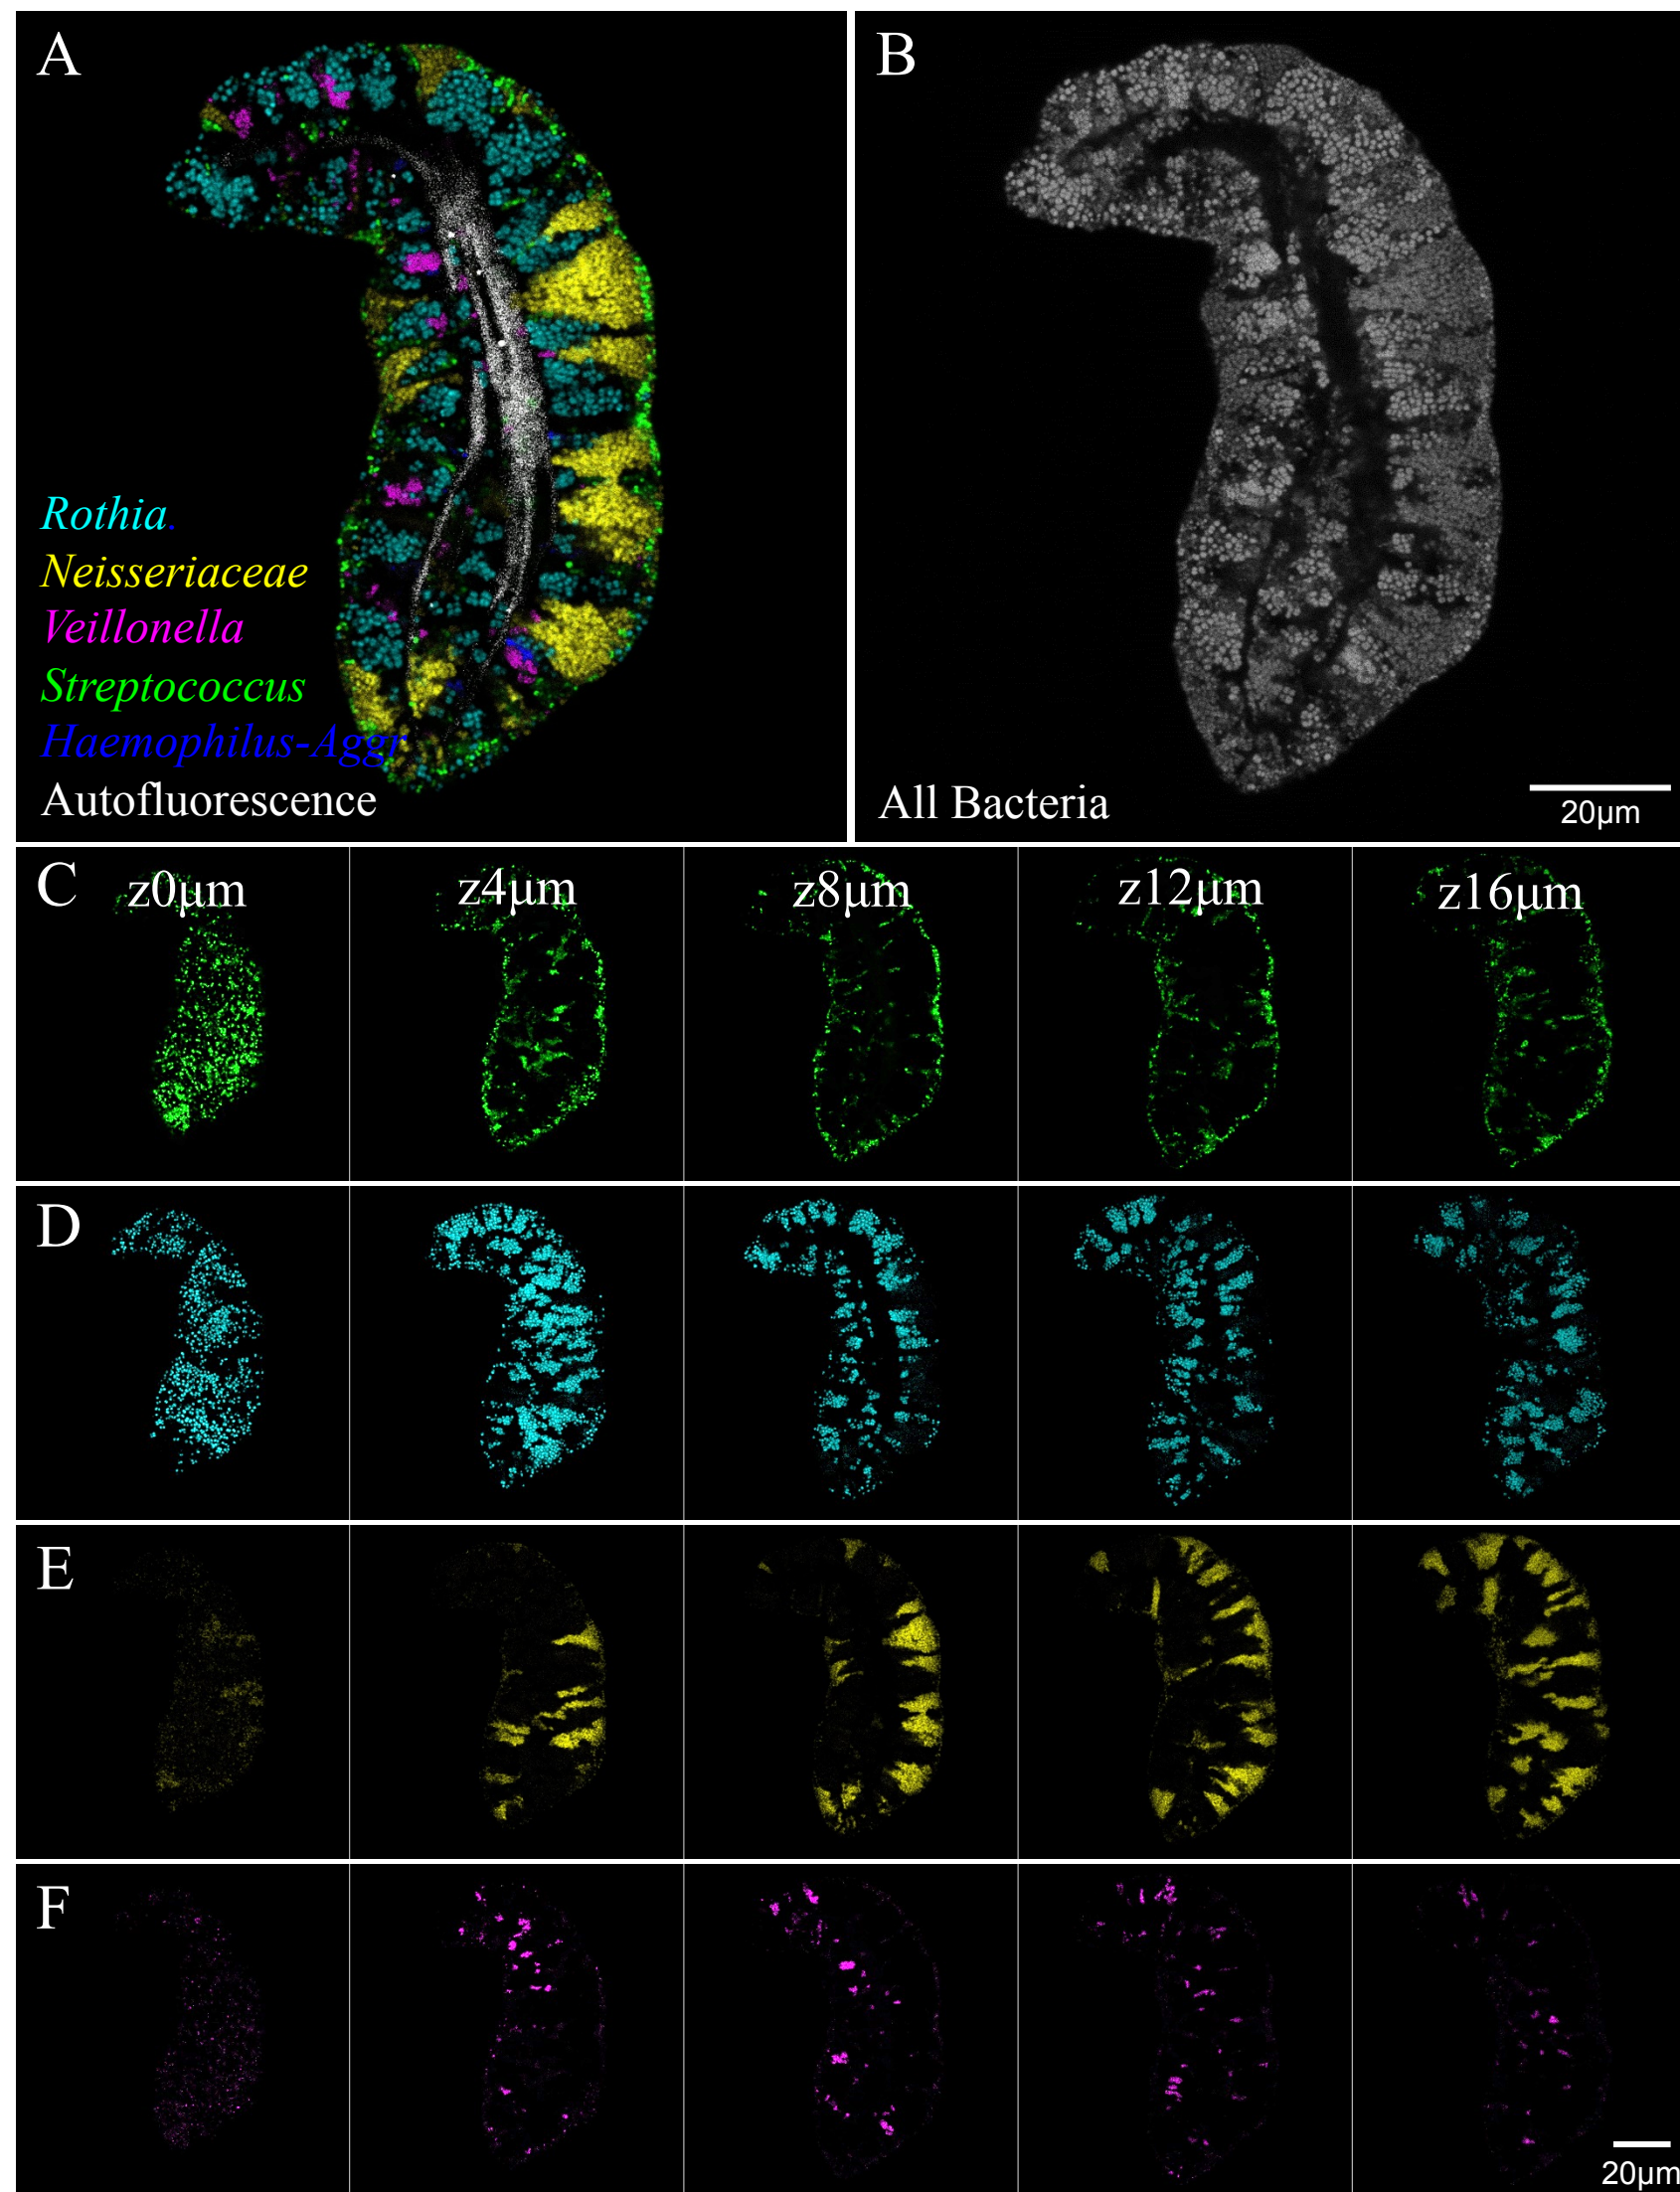

Supplemental Figure 5. **Three-dimensional organization of a consortium. Related to Figure 5, Figure 6.** For this representative consortium, the full-color image (A) is an overlay of five genus- or family-level probes plus autofluorescence, showing the relationship of the taxa to one another and to the epithelial core at this medial plane. The grayscale image (B) shows fluorescence at that same plane from the Eub338 probe, showing that the 5 highlighted taxa represent the majority of the Eub338-positive cells in the image. Separate fluorophore channels shown at 5 different focal planes in the same object (C-F) show the localization of *Streptococcus* around the exterior of the object, of *Rothia* and *Neisseriaceae* in wedge-shaped domains, and of *Veillonella* in interior domains. Planes in (C-F) are 0-16 $\mu$ m deep at 4 $\mu$ m intervals. See Supplemental Video 1 for a flythrough of the entire 20-micron z-stack at an 0.5-micron step size.



Supplemental Figure 6. **Localization of species. Related to Figure 4.** (A)-(E): *Streptococcus* species show differential localization within consortia. A nested probe set subdivides cells of the *Streptococcus* genus into three distinct species groups with distinct localization patterns. (A) Genus probe (Str405) and autofluorescence showing location of the epithelial core. (B): overlay of probes for *S. mitis* (green), *S. salivarius* (red), and *S. parasanguinis* (cyan). *S. mitis* is generally localized to the perimeter of the consortium; *S. parasanguinis* occupies small interior patches; and *S. salivarius* forms larger patches spanning from center to perimeter. Individual species channels are shown separately in panels (C), (D), and (E). Scale bar equals 30 microns. (F)-(K): Nested probe set provides three-level identification of *Actinomyces* cells within consortia. (F) A nested probe set containing probes with distinct fluorophores for the phylum Actinobacteria, the genera *Actinomyces* and *Rothia*, and species groups for *A. odontolyticus* and for *A. naeslundii* was applied to donor material in order to assess and confirm identification of *Actinomyces* cells. Cells hybridizing with the Act382 phylum probe are shown in panel (F) together with autofluorescence showing location of the epithelial core. Genus probes for *Rothia* (Rot491) and *Actinomyces* (Act118) together identify nearly all cells identified with the Act382 phylum probe (G). *A. odontolyticus* species group accounts for majority, but not all, of *Actinomyces* cells in this consortium (compare I with J; overlay shown in K). No cells appeared labeled by the probe targeting *A. naeslundii* (Act476, panel (H)), corroborating sequence analysis results. Scale bar equals 30 microns.

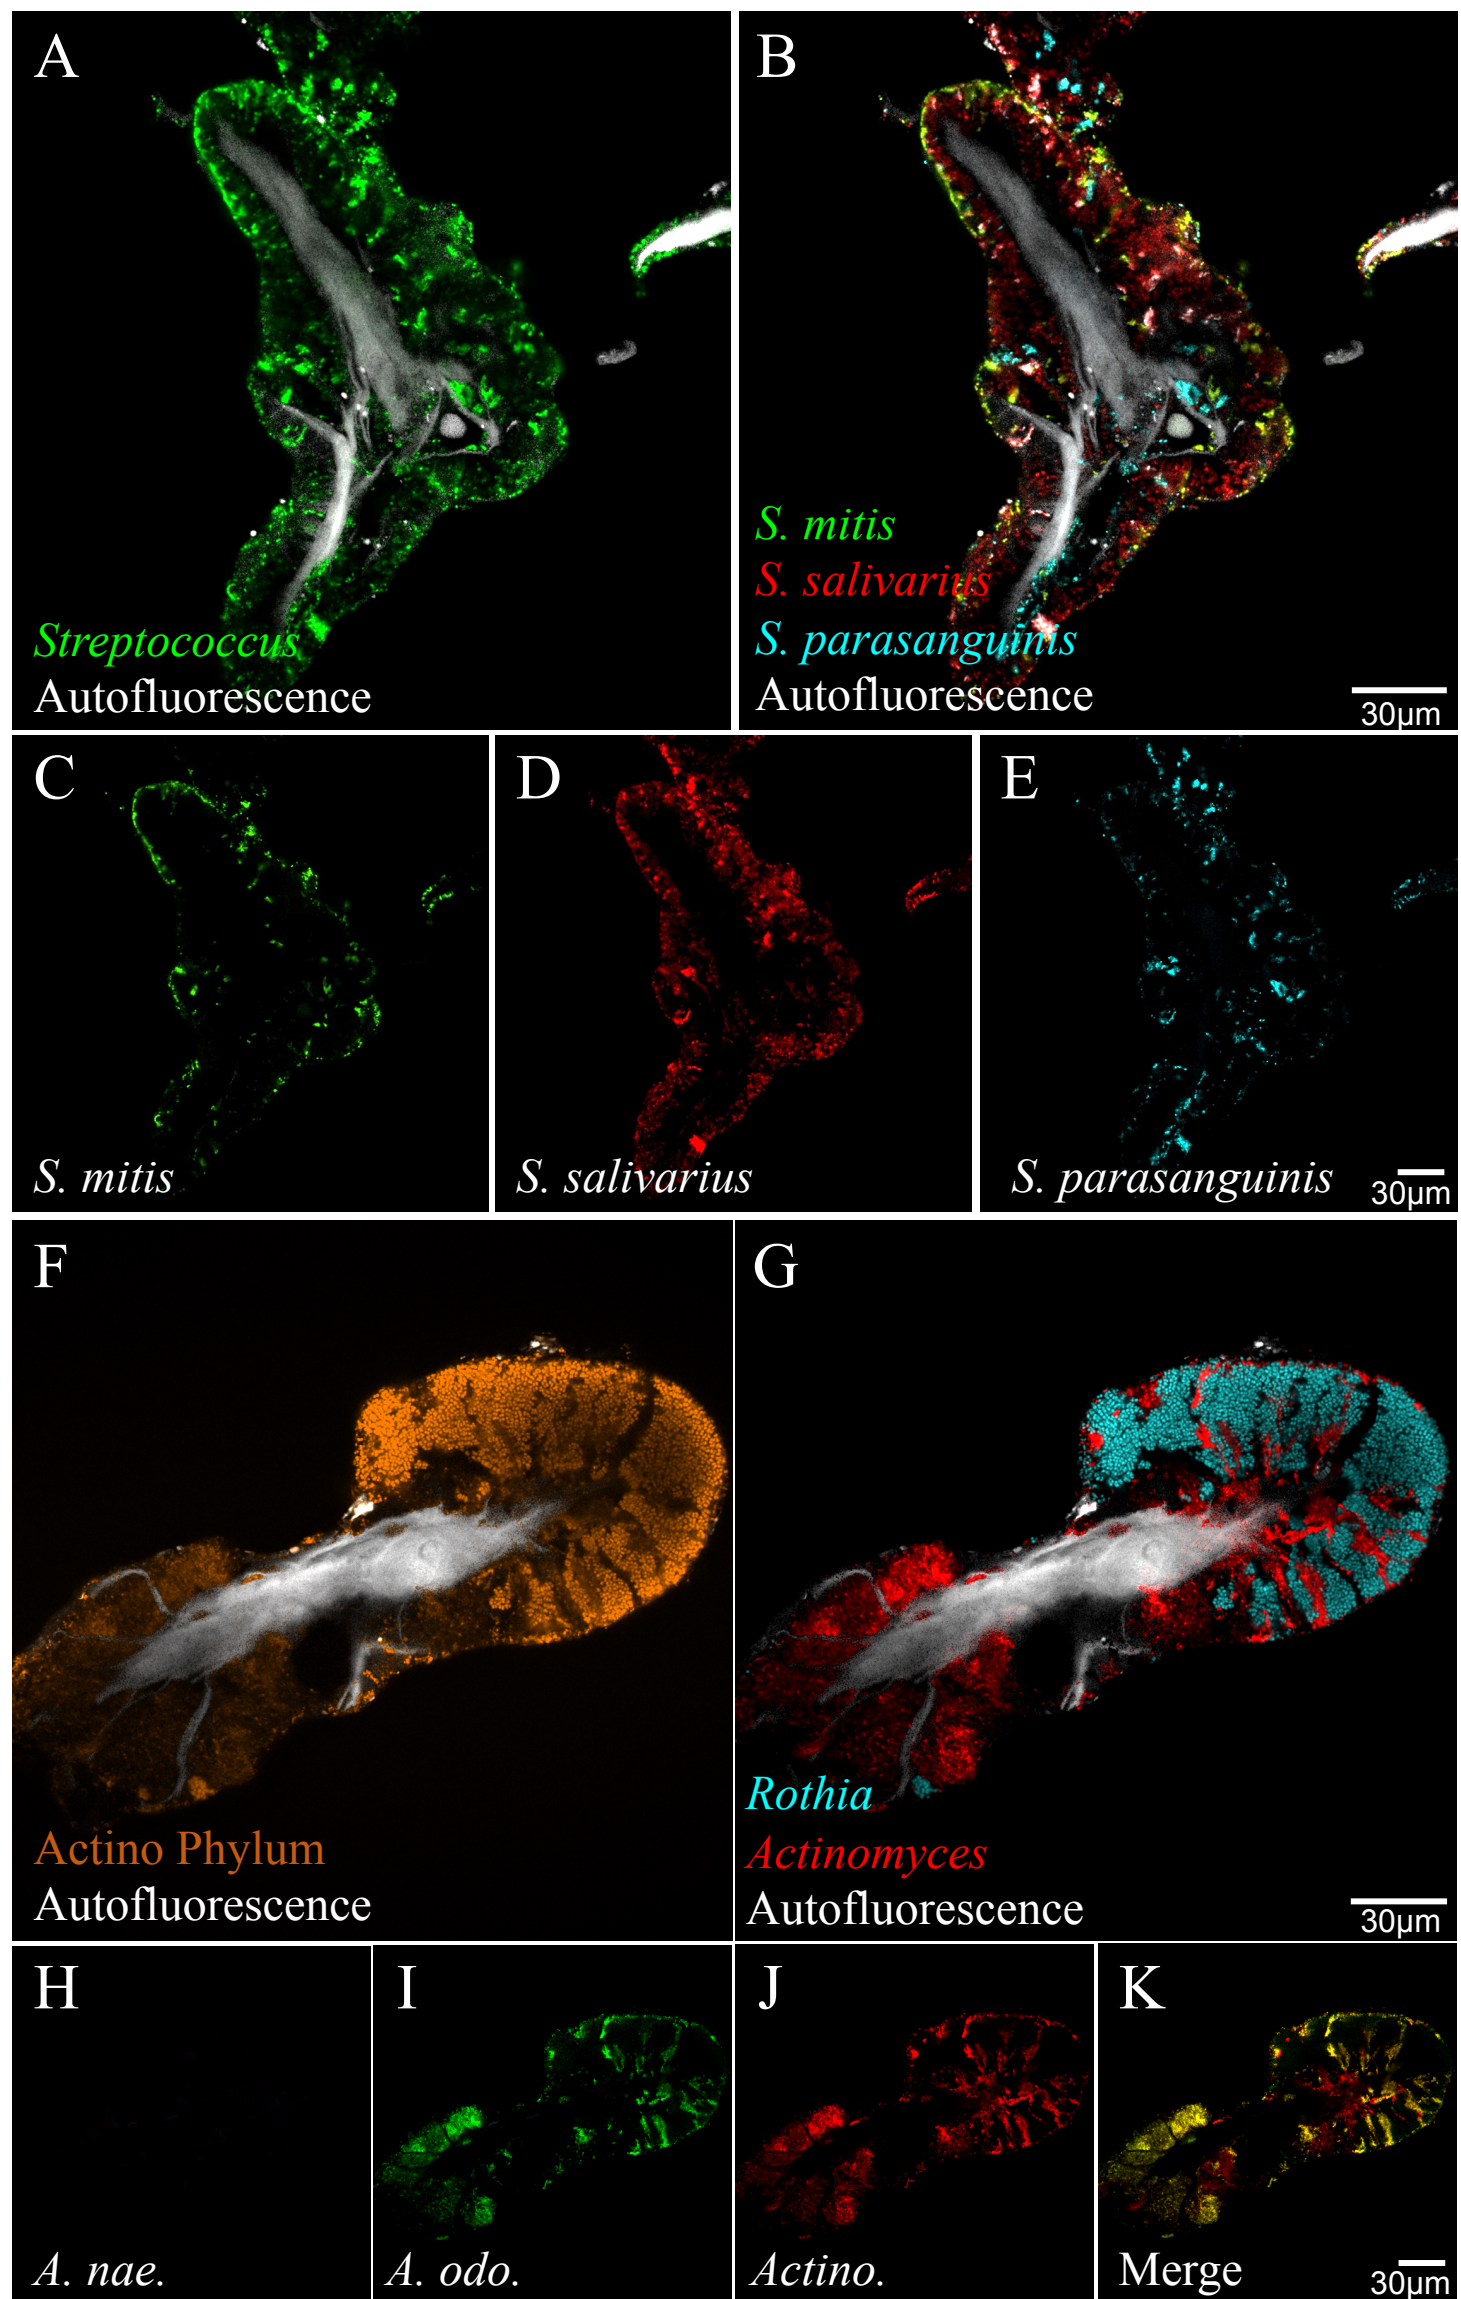

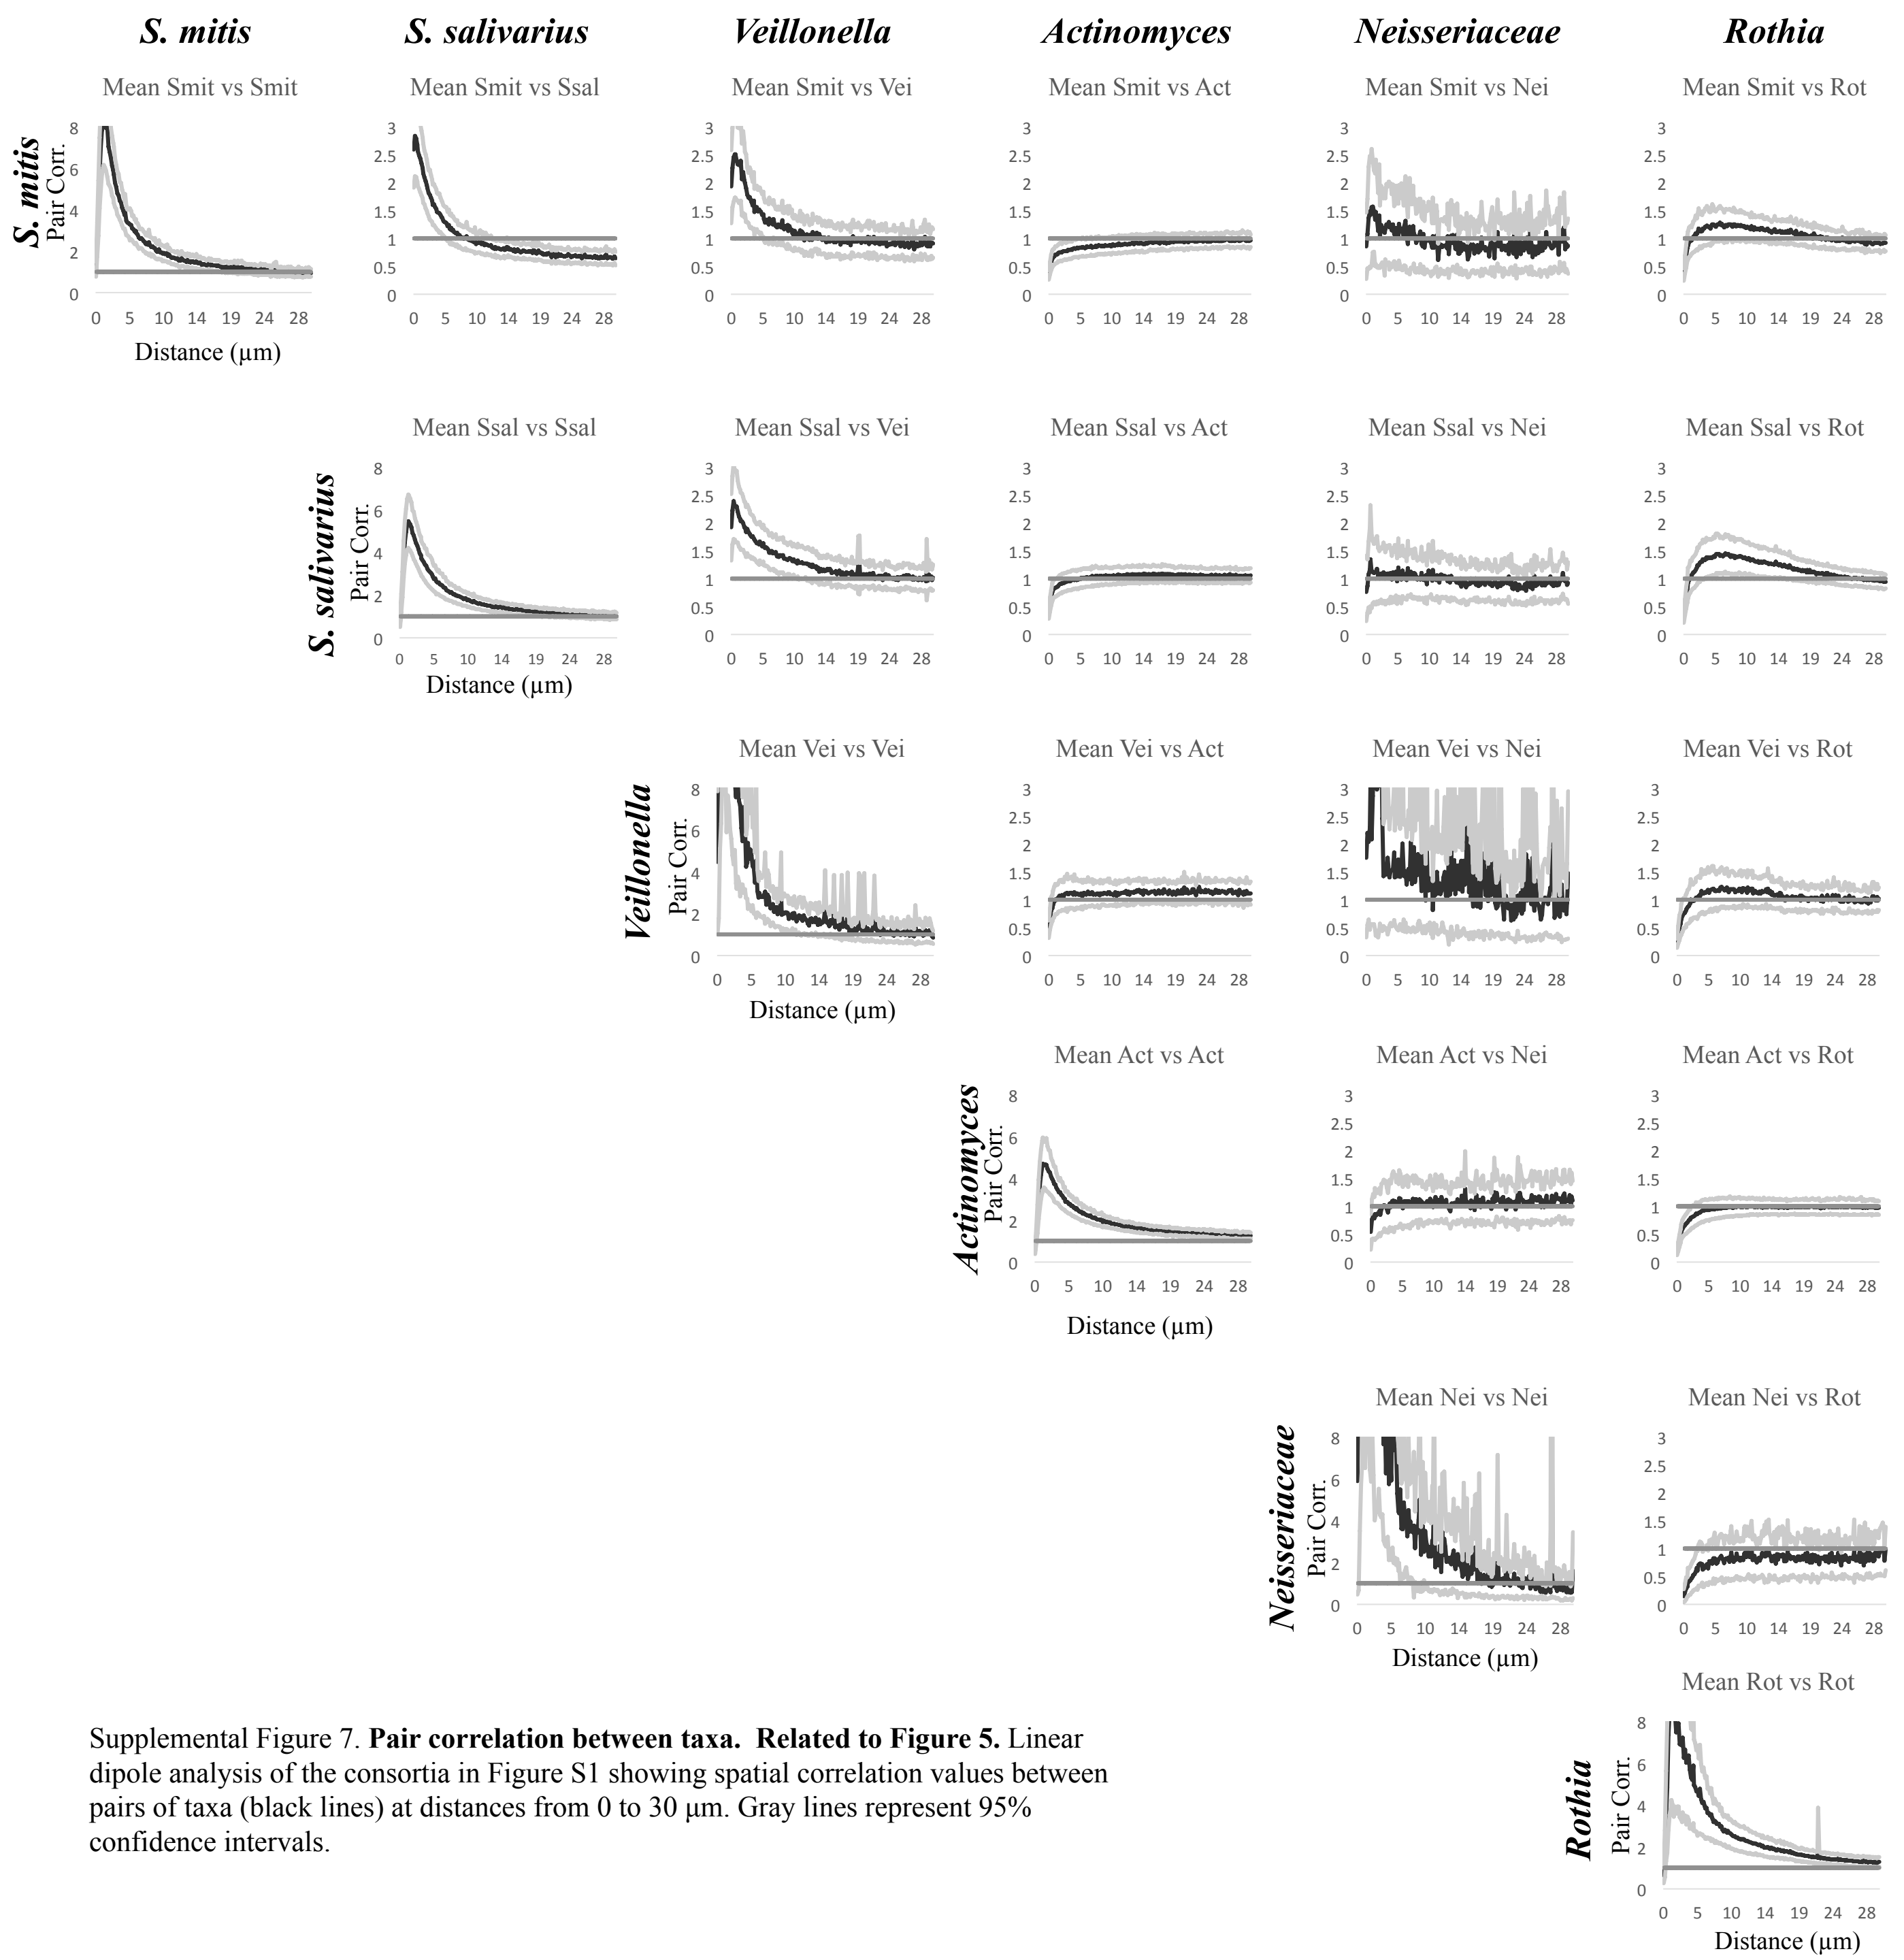

Supplemental Figure 7. **Pair correlation between taxa. Related to Figure 5.** Linear dipole analysis of the consortia in Figure S1 showing spatial correlation values between pairs of taxa (black lines) at distances from 0 to 30  $\mu\text{m}$ . Gray lines represent 95% confidence intervals.



| Probe Name            | Target Taxon |                               |                                     |                                               | Probe Sequence 5'-3'   | Reference                    |
|-----------------------|--------------|-------------------------------|-------------------------------------|-----------------------------------------------|------------------------|------------------------------|
|                       | Domain       | Family                        | Genus                               | Species                                       |                        |                              |
| Eub338                | Bacteria     |                               |                                     |                                               | GCTGCCTCCCGTAGGAGT     | Amann et al. 1990            |
| <b>Actinobacteria</b> |              |                               |                                     |                                               |                        |                              |
| Act118                |              |                               | <i>Actinomyces</i>                  |                                               | GGCAGGTTACTCACGTGTT    | This Paper                   |
| Rot491                |              |                               | <i>Rothia</i>                       |                                               | TAGCCGGCGCTTTCTCTG     | Valm et al. 2011             |
| Aodo475               |              |                               |                                     | <i>A.odontolyticus</i> group                  | TTACCCACTACCCTCACCA    | This Paper                   |
| Agra475               |              |                               |                                     | <i>A.graevenitzii</i>                         | CTTATCCAGGTACCCTCAACAC | This Paper                   |
| Rmuc435               |              |                               |                                     | <i>R.mucilaginosa</i>                         | TCTCTTCTCCCTGCTAACAG   | This Paper                   |
| Cor430                |              | Coriobacteriaceae             | <i>Atopobium, Olsenella</i>         |                                               | TCCCTGCTGAAAGCGGTT     | This Paper                   |
| <b>Bacteroidetes</b>  |              |                               |                                     |                                               |                        |                              |
| Pre392                |              |                               | <i>Prevotella, Alloprevotella</i>   |                                               | GCACGCTACTTGGCTGG      | Diaz et al. 2006             |
| Por1160               |              |                               | <i>Porphyromonas</i> (subset)       |                                               | CCTCACGCCTTACGACGG     | Valm et al. 2011             |
| Cap371                |              |                               | <i>Capnocytophaga</i>               |                                               | TCAGTCTTCCGACCATTG     | Zijng et al. 2010            |
| <b>Firmicutes</b>     |              |                               |                                     |                                               |                        |                              |
| Str405                |              |                               | <i>Streptococcus</i>                |                                               | TAGCCGTCCCTTTCTGGT     | Paster et al. 1998           |
| Vei488                |              |                               | <i>Veillonella</i>                  |                                               | CCGTGGCTTTCTATTCCG     | Chalmers et al. 2008         |
| Gem572                |              |                               | <i>Gemella</i>                      |                                               | TAAACCACCTGCGCGCGCTT   | Valm et al. 2011             |
| Smit651               |              |                               |                                     | <i>S.mitis</i> group                          | CCCCTCTTGCACTCAA       | This Paper                   |
| Ssal372               |              |                               |                                     | <i>S.salivarius</i> group                     | AGGGTTGCCCCCAT         | This Paper                   |
| Lac432                |              | <i>Lachnospiraceae</i>        |                                     |                                               | TCTTCCCTGCTGATAGAGCT   | This Paper; Kong et al. 2010 |
| Gra65                 |              |                               | <i>Granulicatella</i>               |                                               | GCACCGGTCGCTCTCGTT     | Valm, This Paper             |
| <b>Proteobacteria</b> |              |                               |                                     |                                               |                        |                              |
| Nei1030               |              | <i>Neisseriaceae</i>          |                                     |                                               | CCTGTGTTACGGCTCCCG     | Valm et al. 2011             |
| Pas111                |              | <i>Pasteurellaceae</i>        | <i>Haemophilus, Aggregatibacter</i> |                                               | TCCAAGCATTACTCACC      | Valm et al. 2011             |
| Cam1021               |              |                               | <i>Campylobacter</i>                |                                               | ATTTCTGCAAGCAGACTC     | Valm et al. 2011             |
| Nsubfla177            |              |                               |                                     | <i>N. flavescens</i> group, <i>N.subflava</i> | CTTTCCTCCTCAGAGAATATG  | This Paper                   |
| Nfla469               |              |                               |                                     | <i>N.flavescens</i> group                     | GTACCGTCATCAGCTGTGCG   | This Paper                   |
| <b>Fusobacteria</b>   |              |                               |                                     |                                               |                        |                              |
| Fus714                |              |                               | <i>Fusobacterium</i>                |                                               | GGTTCCCCATCGGCATT      | Valm et al. 2011             |
| Lep568                |              |                               | <i>Leptotrichia</i>                 |                                               | GCCTAGATGCCCTTTATG     | Valm et al. 2011             |
| <b>TM7</b>            |              |                               |                                     |                                               |                        |                              |
| TM7550                |              | <i>TM7 (Saccharibacteria)</i> |                                     |                                               | CCCAGTCACTCCGGATAA     | Valm, This Paper             |

Supplemental Table 2. Probes employed in this study. Related to Figure 2, Figure 3, Figure 4, Figure 5, Figure 6. Probes are listed by phylum; the probe name, target taxon, and probe sequence are shown.

| Oligo-nucleotide Probe Name | Probe Set 1                              | Probe Set 2       | Probe Set 3    | Probe Set 4   | Probe Set 5   | Probe Set 6      | Probe Set 7   | Probe Set 8   | Probe Set 9    | Probe Set 10  | Probe Set 11  | Probe Set 12        | Probe Set 13        | Probe Set 14  | Probe Set 15   |
|-----------------------------|------------------------------------------|-------------------|----------------|---------------|---------------|------------------|---------------|---------------|----------------|---------------|---------------|---------------------|---------------------|---------------|----------------|
| Eub338                      |                                          |                   |                | Dy 415 Dual   | Dy 415 Dual   | Dy 415 Dual      | Dy 415 Dual   | Dy 415 Dual   |                |               |               | Dy 510XL Dual       |                     |               | Dy 415 Dual    |
| Rot491                      | Atto 655 Dual                            | Atto 655 Dual     | Atto 655 Dual  | Atto 655 Dual | Atto 655 Dual | Atto 655 Dual    | Atto 655 Dual | Atto 655 Dual | Atto 655 Dual  | Atto 655 Dual | Atto 655 Dual | Atto 655 Dual       | Atto 655 Dual       | Atto 655 Dual | Atto 655 Dual  |
| Str405                      |                                          | Atto 532 Dual     | Atto 532 Dual  | Atto 532 Dual | Atto 532 Dual | Atto 532 Dual    | Atto 532 Dual | Atto 532 Dual | Atto 532 Dual  | Atto 532 Dual |               | Alexa 488           | Rhodamin Red X Dual |               | Atto 532 Dual  |
| Vei488                      | Atto 550                                 | Atto 550          | Atto 550       | Atto 550      | Atto 550      | Atto 550         | Atto 550      | Atto 550      | Atto 550       | Atto 550      | Atto 550      | Alexa 514           |                     |               | Atto 550       |
| Act118                      | Texas Red X                              | Texas Red X       | Texas Red X    | Texas Red X   | Texas Red X   | Texas Red X      | Texas Red X   | Texas Red X   | Texas Red X    | Texas Red X   | Texas Red X   |                     |                     | Texas Red X   | Texas Red X    |
| Fus714                      |                                          | Pacific Blue Dual | Dy 415 Dual    |               |               |                  |               |               | Dy 415 Dual    |               |               |                     |                     |               | Alexa 514      |
| Pre392                      | Atto 520 Dual                            |                   | Alexa 488      |               |               |                  |               |               |                |               | Dy 505 Dual   |                     |                     |               | Alexa 488      |
| Lep568                      |                                          | Atto 647n         | Rhodamin Red X |               |               |                  |               |               | Rhodamin Red X |               |               |                     |                     |               | Rhodamin Red X |
| Nei1030                     | Atto 620 Dual                            | Atto 620          | Atto 633 Dual  | Atto 633 Dual | Atto 633 Dual | Atto 633 Dual    | Atto 633 Dual | Atto 633 Dual | Atto 633 Dual  | Atto 633 Dual | Atto 620      | Atto 633 Dual       |                     |               | Atto 633 Dual  |
| Gra65                       |                                          |                   | Alexa 514      |               |               |                  |               |               |                |               |               |                     |                     |               |                |
| Pas111                      |                                          | Atto 594 Dual     | Dy 615 Dual    |               |               |                  |               |               |                |               |               | Dy 615              |                     |               |                |
| Por1160                     |                                          | Atto 425 Dual     |                |               |               |                  |               |               |                |               |               | Dy 485XL            |                     |               |                |
| TM7550                      |                                          | Rhodamin Red X    |                |               |               |                  |               |               |                |               |               | Rhodamin Red X Dual |                     |               |                |
| Gem572                      |                                          |                   |                |               |               |                  |               |               | Alexa 488      |               |               |                     |                     |               |                |
| Lac432                      |                                          |                   |                |               |               |                  |               |               |                |               |               | Texas Red X         |                     |               |                |
| Smit651                     | Dy 415 Dual                              |                   |                |               |               |                  |               |               |                |               | Dy 415 Dual   |                     | Dy 415 Dual         |               |                |
| Ssa1372                     | Dy 490 Dual                              |                   |                |               |               |                  |               |               |                |               | Dy 490 Dual   |                     | Dy 490 Dual         |               |                |
| Spar21                      |                                          |                   |                |               |               |                  |               |               |                |               |               |                     | Rhodamin Red X Dual |               |                |
| Rmuc435                     |                                          |                   |                | Dy 490        |               |                  |               |               |                |               |               |                     |                     |               |                |
| Nsubfla177                  |                                          |                   |                |               |               |                  |               | Dy 490        |                |               |               |                     |                     |               |                |
| Nfla469                     |                                          |                   |                |               |               |                  | Dy 490        |               |                |               |               |                     |                     |               |                |
| Aodo475                     |                                          |                   |                |               | Dy 490        |                  |               |               |                |               |               |                     |                     |               | Dy 490         |
| Agra475                     |                                          |                   |                |               |               | Dy 490           |               |               |                |               |               |                     |                     |               |                |
| Act382                      |                                          |                   |                |               |               |                  |               |               |                |               |               |                     |                     |               | Dy 415 Dual    |
| Act476                      |                                          |                   |                |               |               |                  |               |               |                |               |               |                     |                     |               | Dy 510XL Dual  |
| Shown in:                   | Fig. 2, Fig. 4F, Fig. 6D, Fig S1, Vid. 3 | Fig. 3A           | Fig. 3B        | Fig. 4A       | Fig. 4B       | Fig. 4C, Fig. 6E | Fig. 4D       | Fig. 4E       | Fig. 5         | Fig. 6 A-C    | Fig. 6F       | Fig. S5, Vid. 1     | Fig. S6 A-E         | Fig. S6 F-K   | Vid. 2         |

Supplemental Table 3. **Probe sets employed in figures. Related to Figure 2, Figure 3, Figure 4, Figure 5, Figure 6.** For each set, the table lists the probes used (oligonucleotide and fluorophore) as well as the figure panels in which that probe set is shown. "Dual" indicates that the probe was labeled with the same fluorophore at both 5' and 3' ends; if "dual" is not specified, the probe was labeled only at the 5' end.



| Genus Level Imaging-Based Prevalence      |            |          |                |        |               |
|-------------------------------------------|------------|----------|----------------|--------|---------------|
| Target                                    | Probe      | Subjects | Prevalence (%) | Images | Frequency (%) |
| <i>Actinomyces</i>                        | Act118     | 11       | 100            | 152    | 98            |
| <i>Streptococcus</i>                      | Str405     | 20       | 100            | 325    | 96.6          |
| <i>Rothia</i>                             | Rot491     | 20       | 100            | 365    | 94.8          |
| <i>Veillonella</i>                        | Vei488     | 20       | 100            | 346    | 85.3          |
| <i>Gemella</i>                            | Gem572     | 12       | 100            | 32     | 75            |
| <i>Neisseriaceae</i>                      | Nei1030    | 20       | 100            | 284    | 69            |
| <i>Saccharibacteria (TM7)</i>             | TM7550     | 6        | 100            | 56     | 32.1          |
| <i>Granulicatella</i>                     | Gra65      | 20       | 95             | 128    | 80.5          |
| <i>Prevotella</i>                         | Pre392     | 12       | 91.7           | 145    | 52.4          |
| <i>Fusobacteria</i>                       | Fus714     | 19       | 89.5           | 173    | 60.1          |
| <i>Capnocytophaga</i>                     | Cap371     | 8        | 62.5           | 37     | 16.2          |
| <i>Leptotrichia</i>                       | Lep568     | 13       | 53.8           | 85     | 40            |
| <i>Porphyromonas</i>                      | Por1160    | 16       | 50             | 56     | 23.2          |
| <i>Haemophilus-Aggregatib.</i>            | Pas111     | 20       | 40             | 130    | 16.2          |
| <i>Atopobium</i>                          | Cor430     | 16       | 37.5           | 63     | 28.6          |
| <i>Campylobacter</i>                      | Cam1021    | 17       | 17.6           | 104    | 2.9           |
| <i>Lachnospiraceae</i>                    | Lac432     | 14       | 7.1            | 44     | 43.2          |
| <i>Corynebacterium</i>                    | Cor633     | 6        | 0              | 23     | 0             |
| Species Level Imaging-Based Prevalence    |            |          |                |        |               |
| Target                                    | Probe      | Subjects | Prevalence (%) | Images | Frequency (%) |
| <i>A. odontolyticus</i>                   | Aodo475    | 10       | 100.0          | 30     | 100.0         |
| <i>R. mucilaginosa</i>                    | Rmuc435    | 10       | 100.0          | 10     | 100.0         |
| <i>S. mitis</i>                           | Smit651    | 4        | 100.0          | 40     | 100.0         |
| <i>S. salivarius</i>                      | Ssal372    | 4        | 100.0          | 40     | 95.0          |
| <i>N. subflava</i> + <i>N. flavescens</i> | Nsubfla177 | 10       | 100.0          | 11     | 90.9          |
| <i>N. flavescens</i>                      | Nfla469    | 10       | 70.0           | 10     | 70.0          |
| <i>A. graevenitzii</i>                    | Agra475    | 10       | 30.0           | 10     | 30.0          |

Supplemental Table 4. **Prevalence and abundance of taxa in tongue consortia assessed by imaging. Related to Figure 3.** Twenty-five FISH probes were used to assess the prevalence and abundance of taxa in tongue consortia from up to 20 subjects. Seventeen probes targeted genus- or family-level taxa, 7 targeted species-level groups, and one targeted the phylum Saccharibacteria (TM7). Probes were employed in a variety of probe-set combinations and the number of images in which a taxon was detected was tallied for at least 10 and as many as 365 images. Prevalence was calculated as the percent of tested subjects in which the taxon was detected; frequency was calculated as the percent of images in which the taxon was detected.
